# Supplementary material for: Anion templating from a silver(i) dithiophosphate 1D polymer forming discrete cationic and neutral octa- and decanuclear silver(i) clusters
Source: Royal Society of Chemistry journal article supplement (doi:10.1039/c4dt00691g), 2014-01-01
Supplement: c4dt00691g1.pdf [file c4dt00691g1.pdf]

## Supplementary Information

### Anion templating from a silver(I) dithiophosphate 1D polymer forming discrete cationic and neutral octa- and decanuclear silver(I) clusters

Jian-Hong Liao,<sup>a</sup> Hao-Wei Chang,<sup>a</sup> Yi-Juan Li,<sup>a</sup> Ching-Shiang Fang,<sup>a</sup> Bijay Sarkar,<sup>a</sup>  
Werner E. van Zyl,<sup>\*,b</sup> and C. W. Liu<sup>\*,a</sup>

<sup>a</sup>Department of Chemistry, National Dong Hwa University, Hualien, Taiwan 97401,  
R.O.C. Fax: +886-3-8633570, E-mail: chenwei@mail.ndhu.edu.tw

<sup>b</sup>School of Chemistry and Physics, University of KwaZulu-Natal, Westville Campus,  
Private Bag X54001, Durban, 4000, South Africa . E-mail: vanzylw@ukzn.ac.za

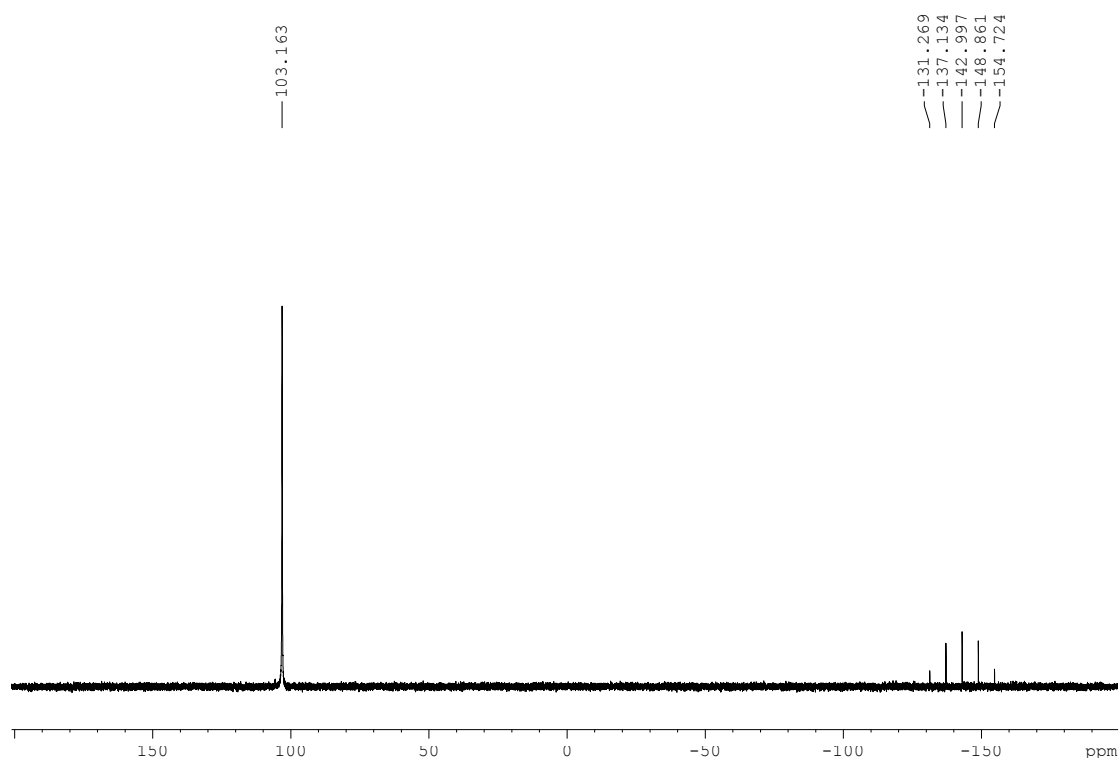

Figure S1 <sup>31</sup>P{<sup>1</sup>H} NMR spectrum of [Ag<sub>5</sub>{S<sub>2</sub>P(O<sup>*i*</sup>Pr)<sub>2</sub>}<sub>4</sub>]<sub>n</sub>(PF<sub>6</sub>)<sub>n</sub>, **1**.

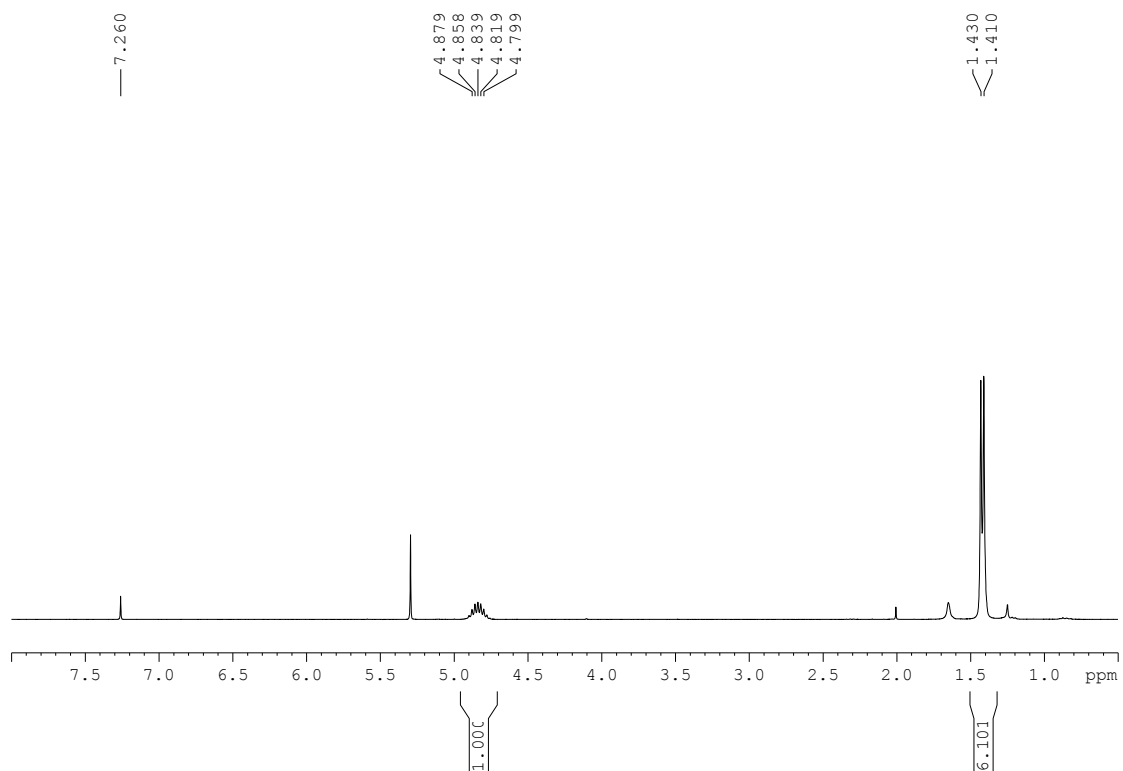

**Figure S2**  $^1\text{H}$  NMR spectrum of  $[\text{Ag}_5\{\text{S}_2\text{P}(\text{O}^i\text{Pr})_2\}_4]_n(\text{PF}_6)_n$ , **1**.

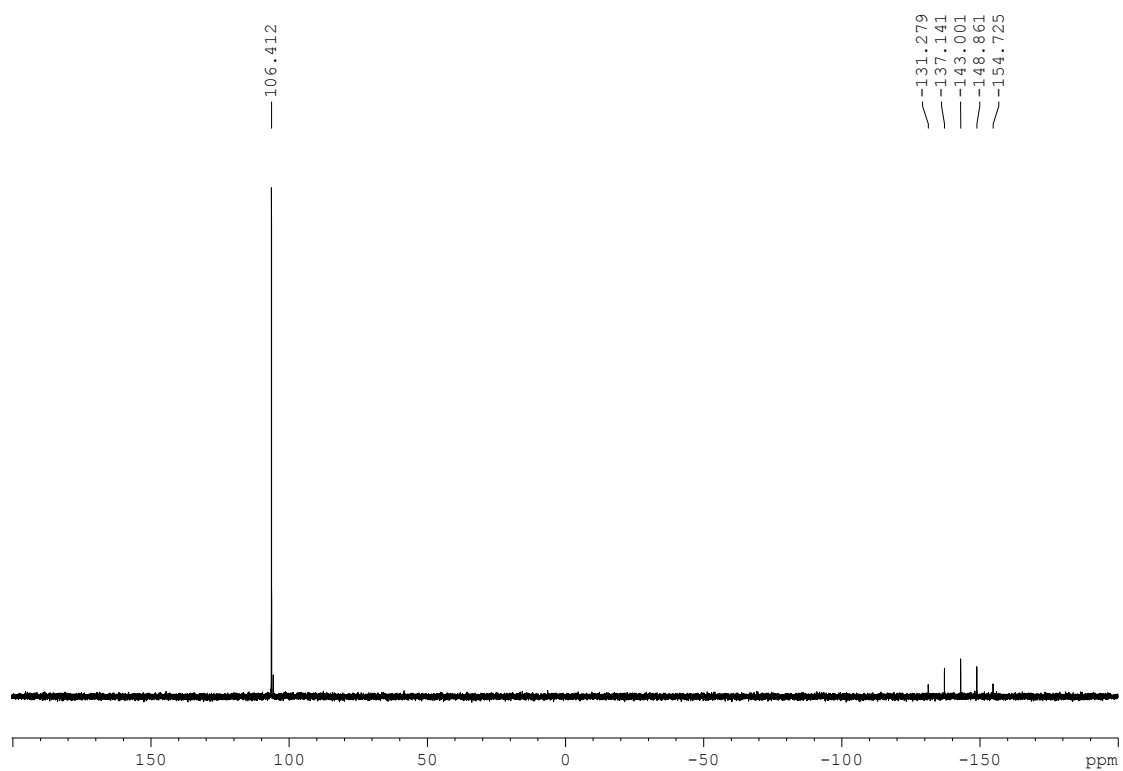

**Figure S3**  $^{31}\text{P}\{^1\text{H}\}$  NMR spectrum of  $[\text{Ag}_8(\mu_8\text{-F})\{\text{S}_2\text{P}(\text{O}^i\text{Pr})_2\}_6](\text{PF}_6)$ , **2**.

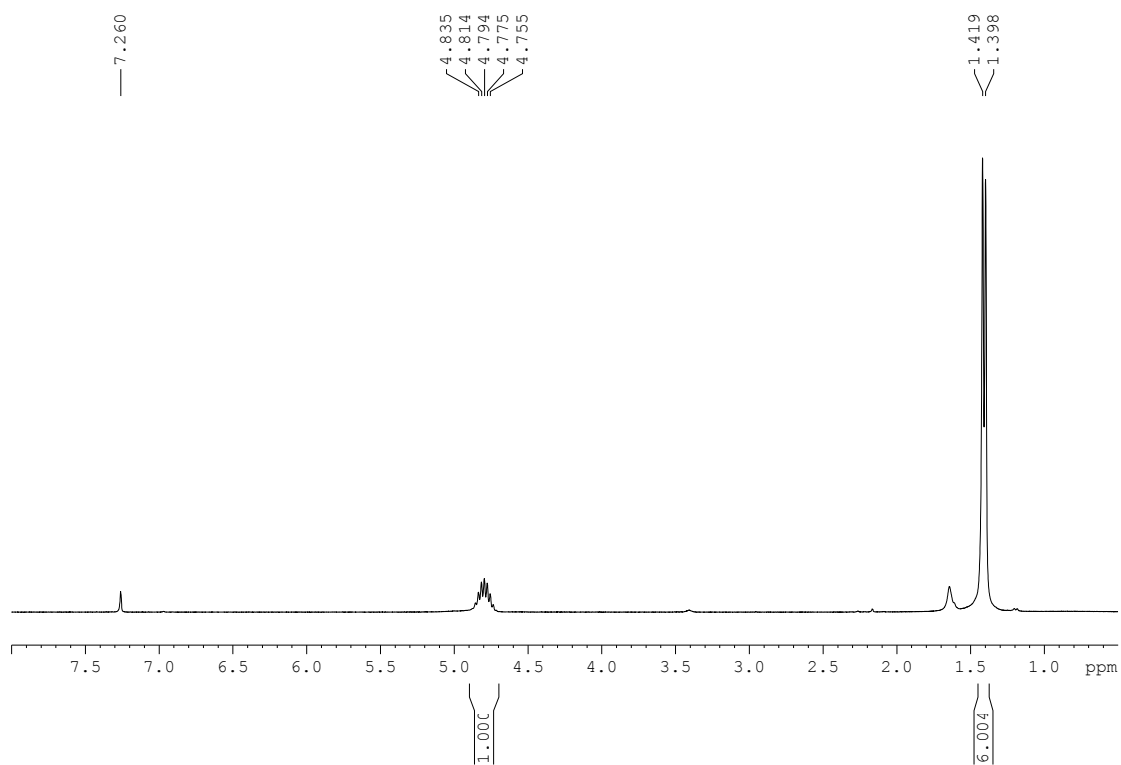

**Figure S4**  $^1\text{H}$  NMR spectrum of  $[\text{Ag}_8(\mu_8\text{-F})\{\text{S}_2\text{P}(\text{O}^i\text{Pr})_2\}_6](\text{PF}_6)$ , **2**.

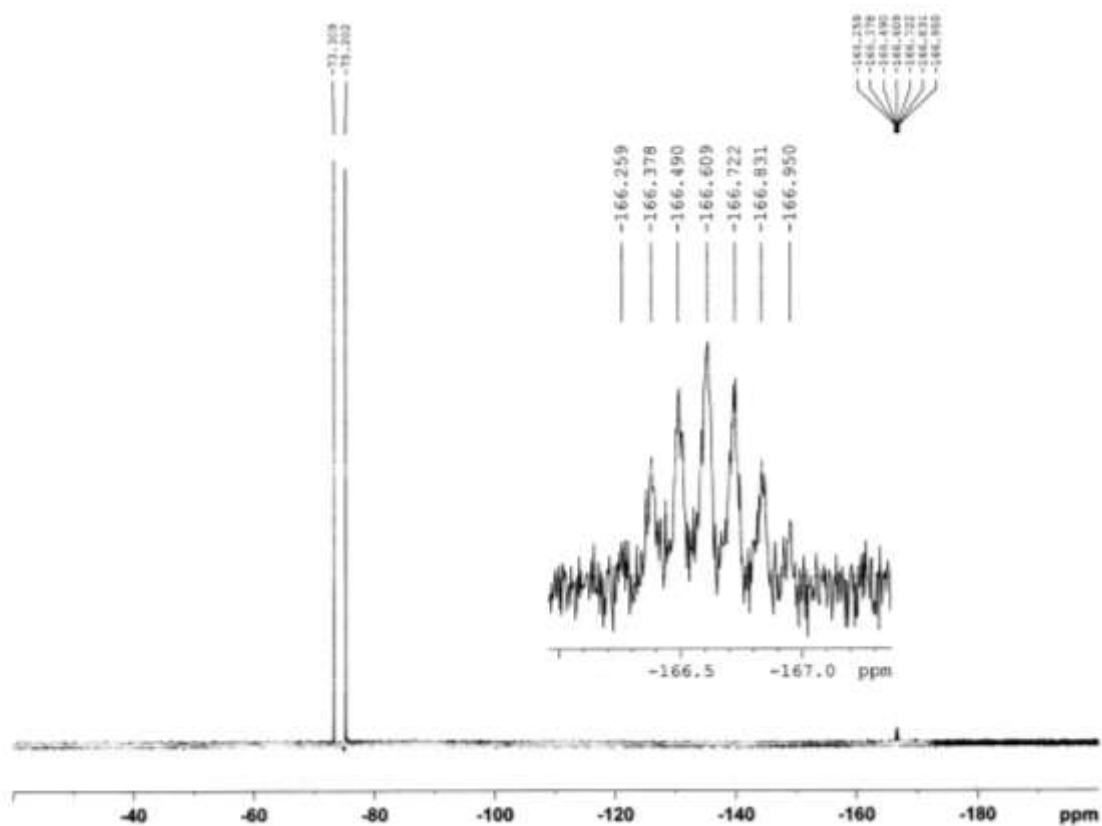

**Figure S5**  $^{19}\text{F}$  NMR spectrum of  $[\text{Ag}_8(\mu_8\text{-F})\{\text{S}_2\text{P}(\text{O}^i\text{Pr})_2\}_6](\text{PF}_6)$ , **2**. Inset is the magnitude around -166 ppm.

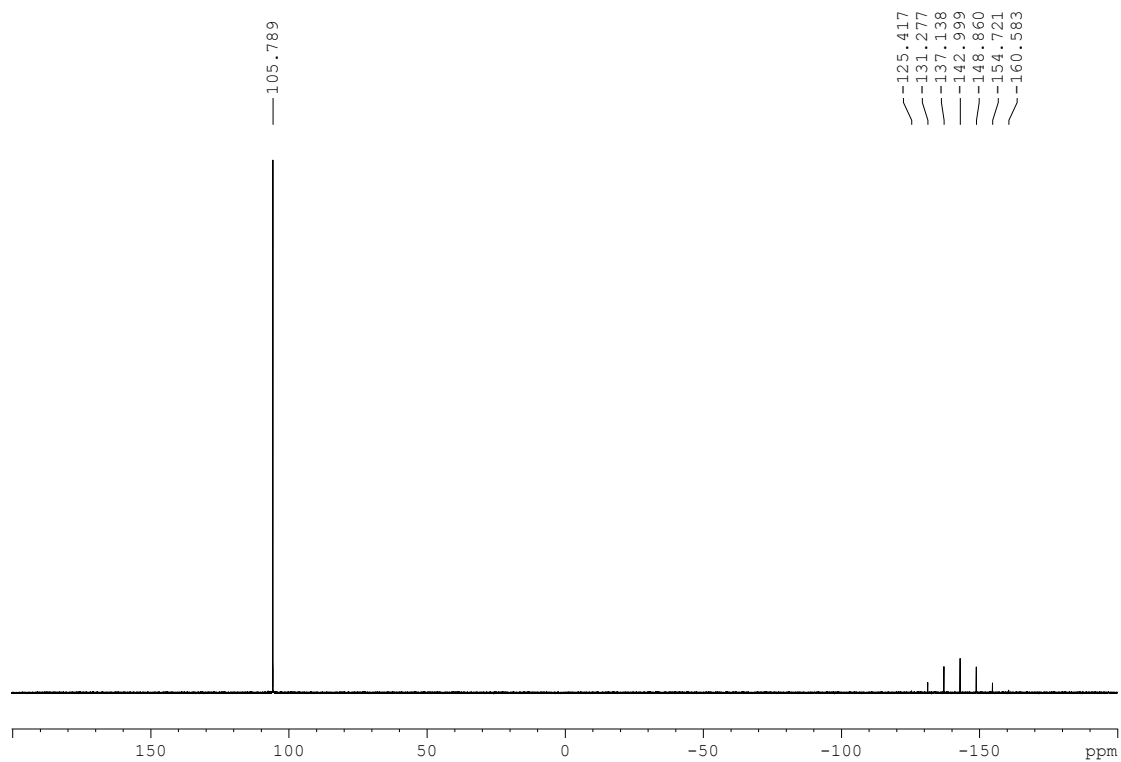

**Figure S6**  $^{31}\text{P}\{^1\text{H}\}$  NMR spectrum of  $[\text{Ag}_8(\mu_8\text{-Cl})\{\text{S}_2\text{P}(\text{O}^i\text{Pr})_2\}_6](\text{PF}_6)$ , **3**.

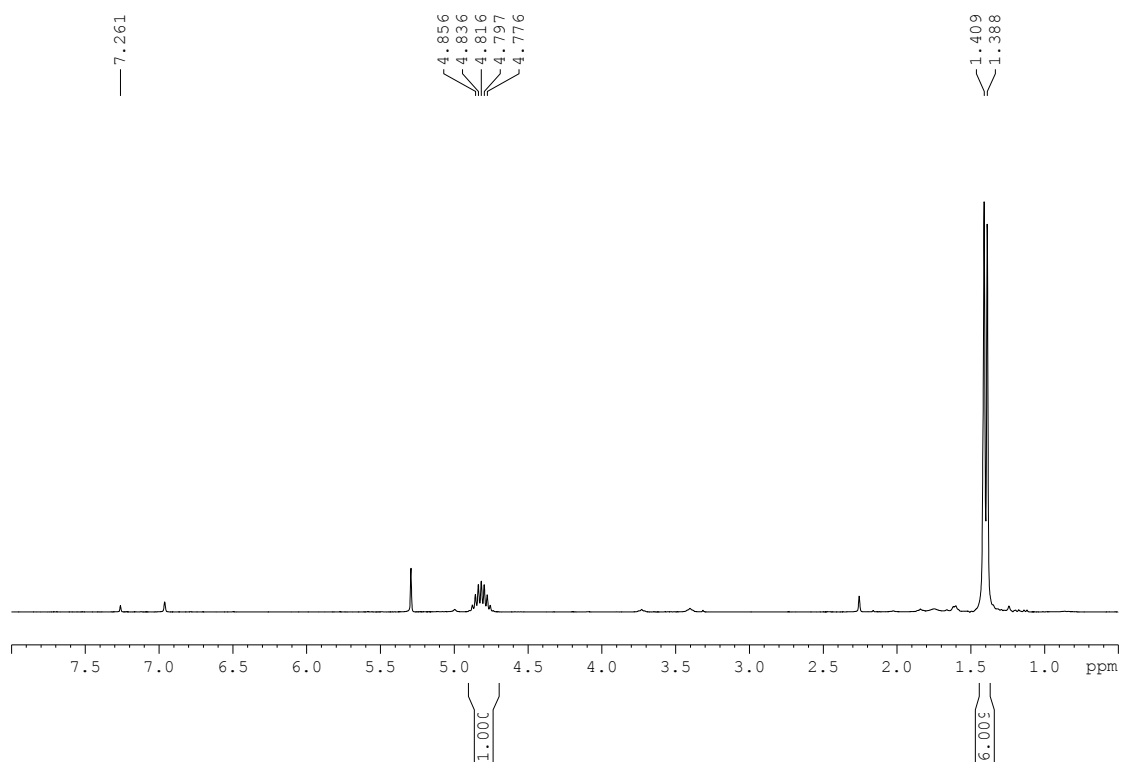

**Figure S7**  $^1\text{H}$  NMR spectrum of  $[\text{Ag}_8(\mu_8\text{-Cl})\{\text{S}_2\text{P}(\text{O}^i\text{Pr})_2\}_6](\text{PF}_6)$ , **3**.

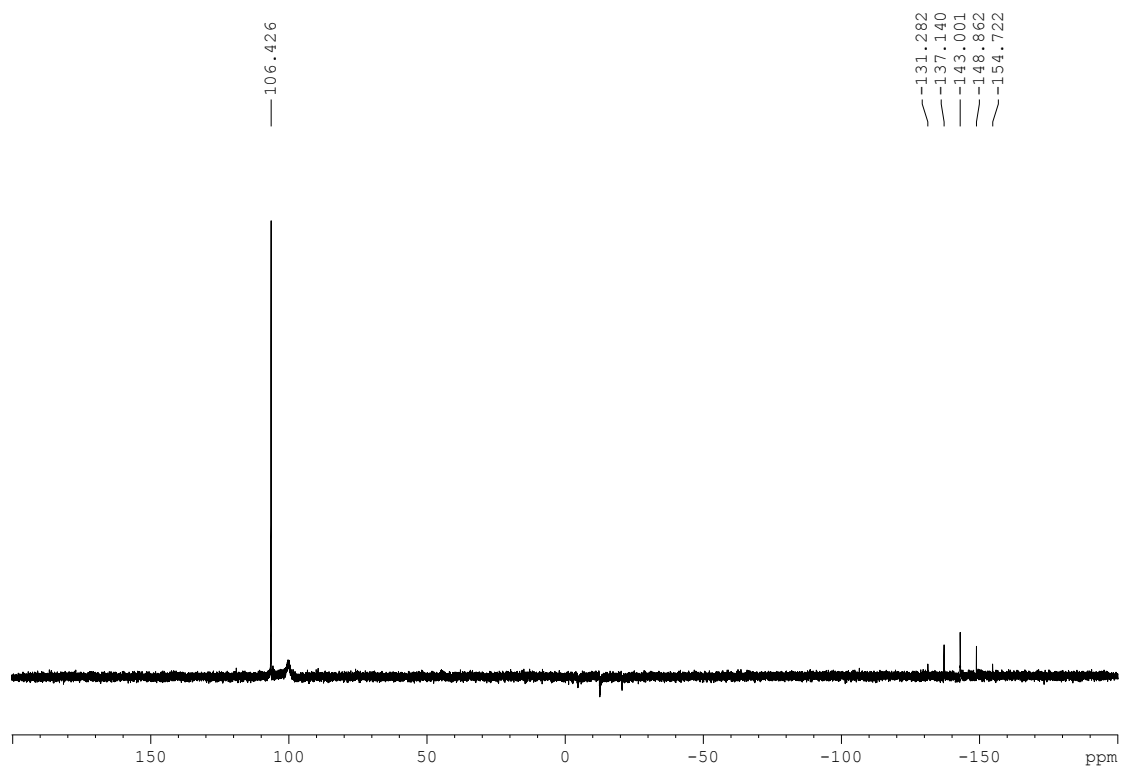

**Figure S8**  $^{31}\text{P}\{^1\text{H}\}$  NMR spectrum of  $[\text{Ag}_8(\mu_8\text{-Br})\{\text{S}_2\text{P}(\text{O}^i\text{Pr})_2\}_6](\text{PF}_6)$ , **4**.

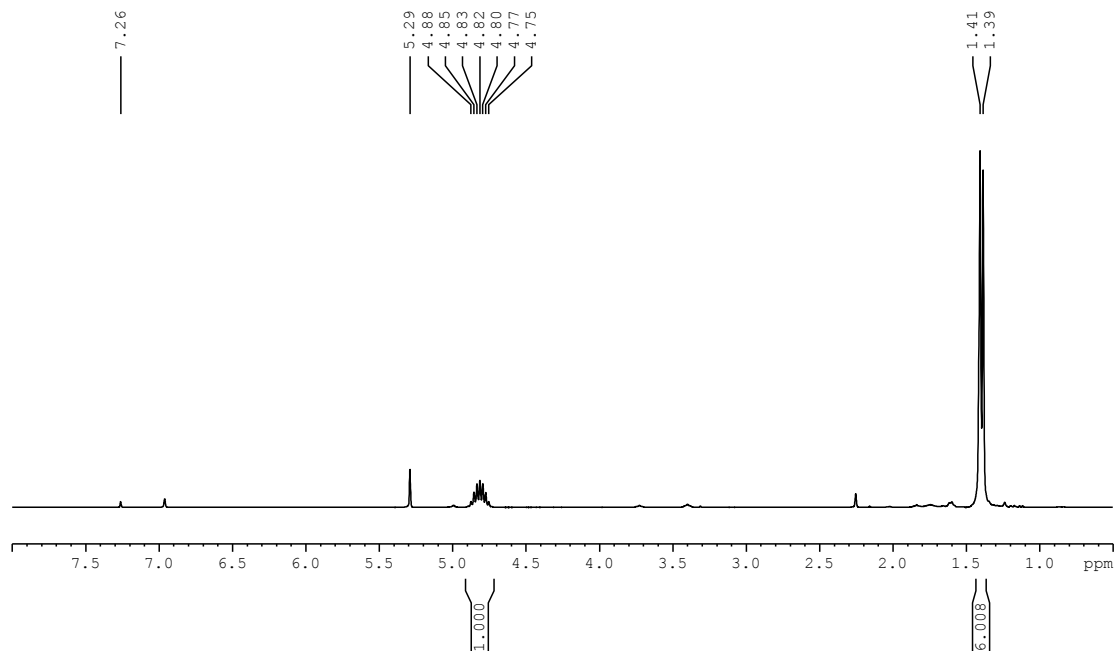

**Figure S9**  $^1\text{H}$  NMR spectrum of  $[\text{Ag}_8(\mu_8\text{-Br})\{\text{S}_2\text{P}(\text{O}^i\text{Pr})_2\}_6](\text{PF}_6)$ , **4**.

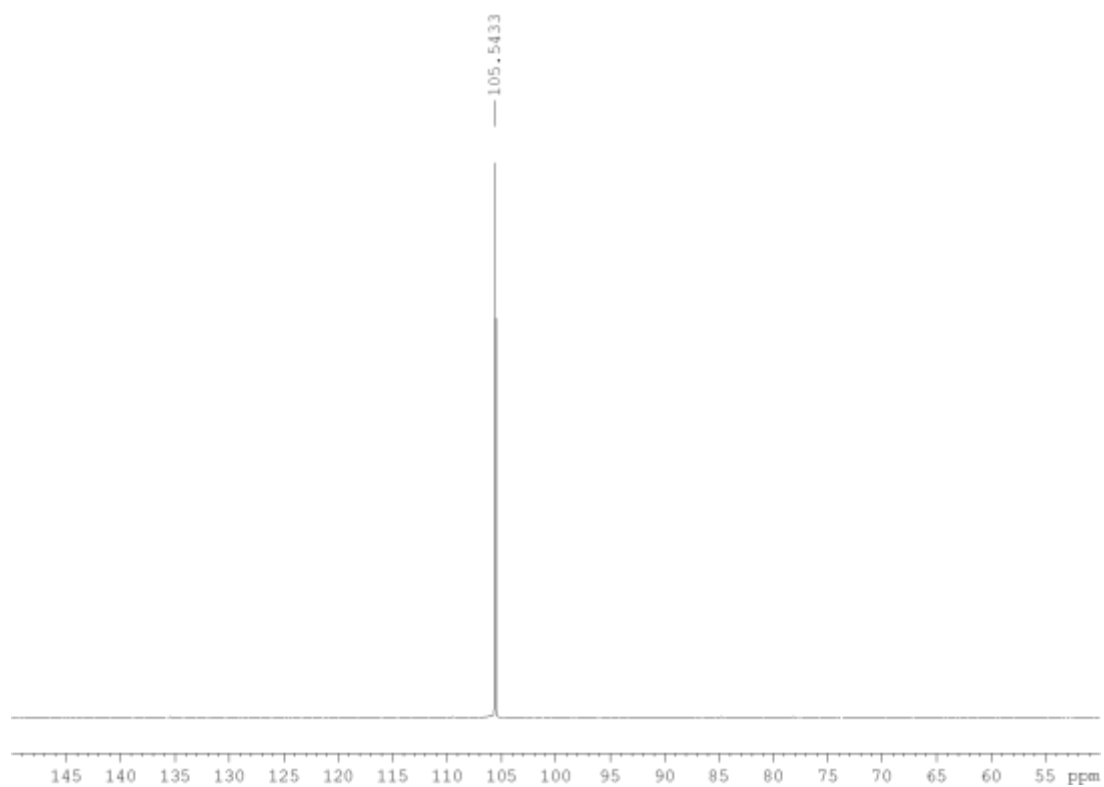

**Figure S10**  $^{31}\text{P}\{^1\text{H}\}$  NMR spectrum of  $[\text{Ag}_8(\mu_4\text{-H})\{\text{S}_2\text{P}(\text{O}^i\text{Pr})_2\}_6](\text{PF}_6)$ , **5**.

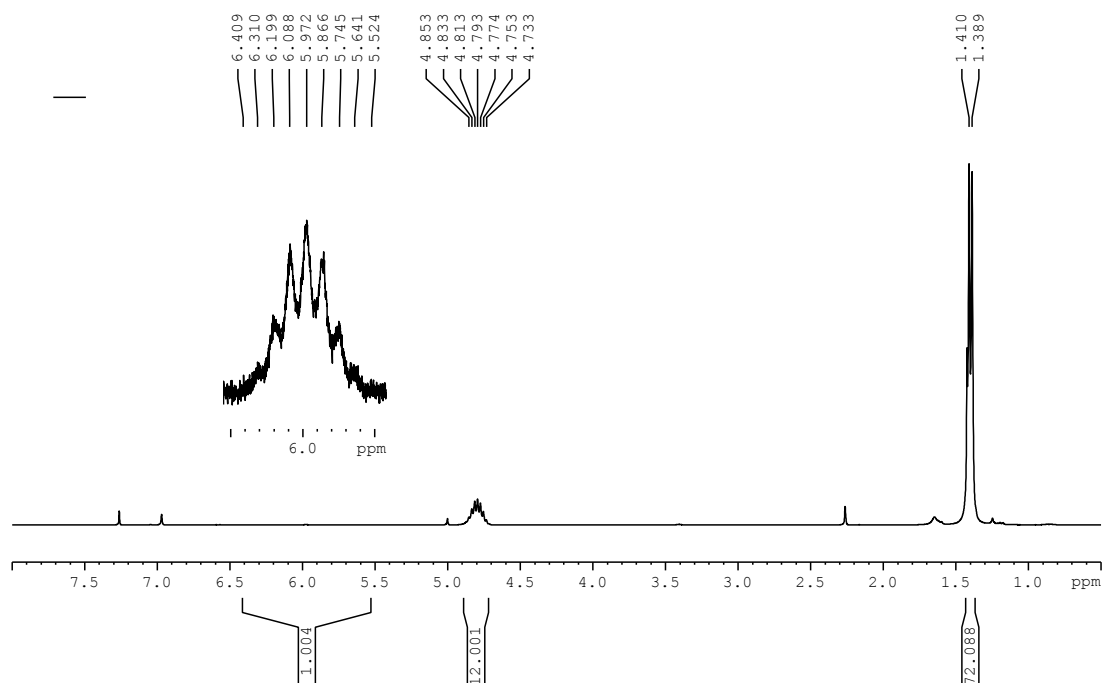

**Figure S11**  $^1\text{H}$  NMR spectrum of  $[\text{Ag}_8(\mu_4\text{-H})\{\text{S}_2\text{P}(\text{O}^i\text{Pr})_2\}_6](\text{PF}_6)$ , **5**. Inset is the magnitude around 6.0 ppm.

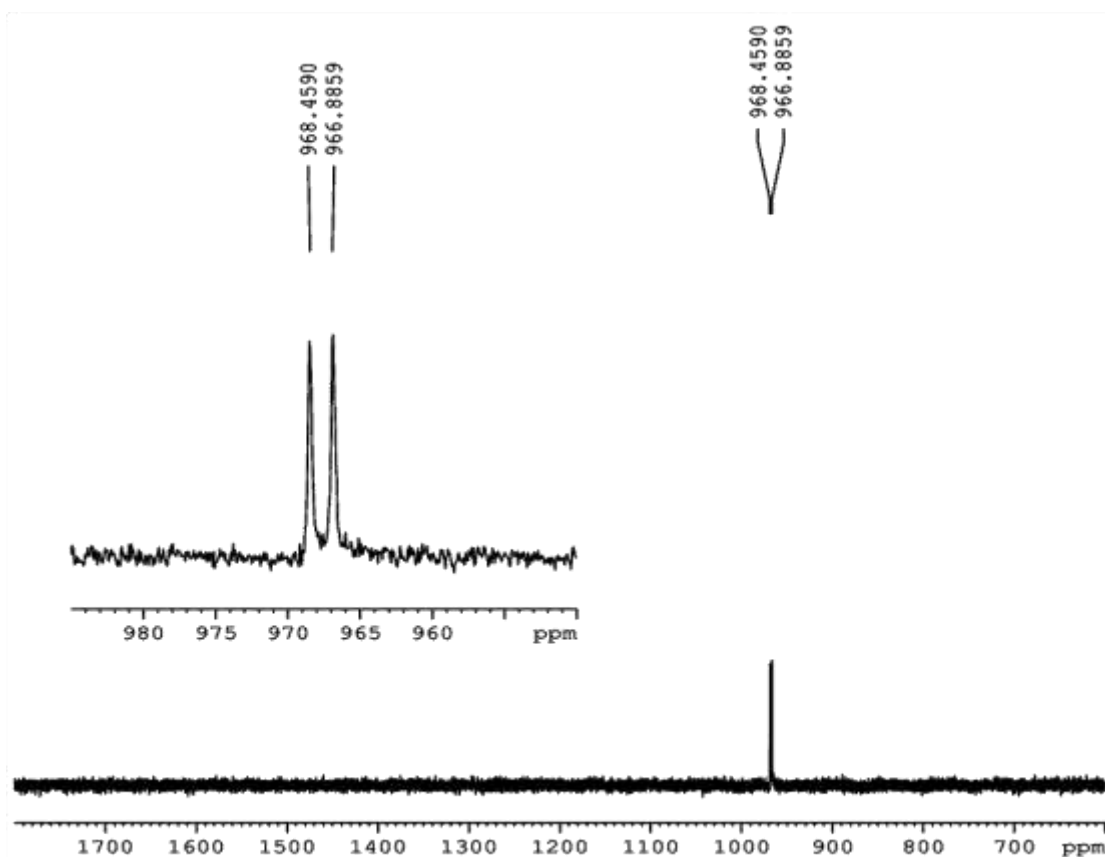

**Figure S12**  $^{109}\text{Ag}\{^1\text{H}\}$  NMR spectrum of  $[\text{Ag}_8(\mu_4\text{-H})\{\text{S}_2\text{P}(\text{O}^i\text{Pr})_2\}_6](\text{PF}_6)$ , **5**. Inset is the magnitude around 967 ppm.

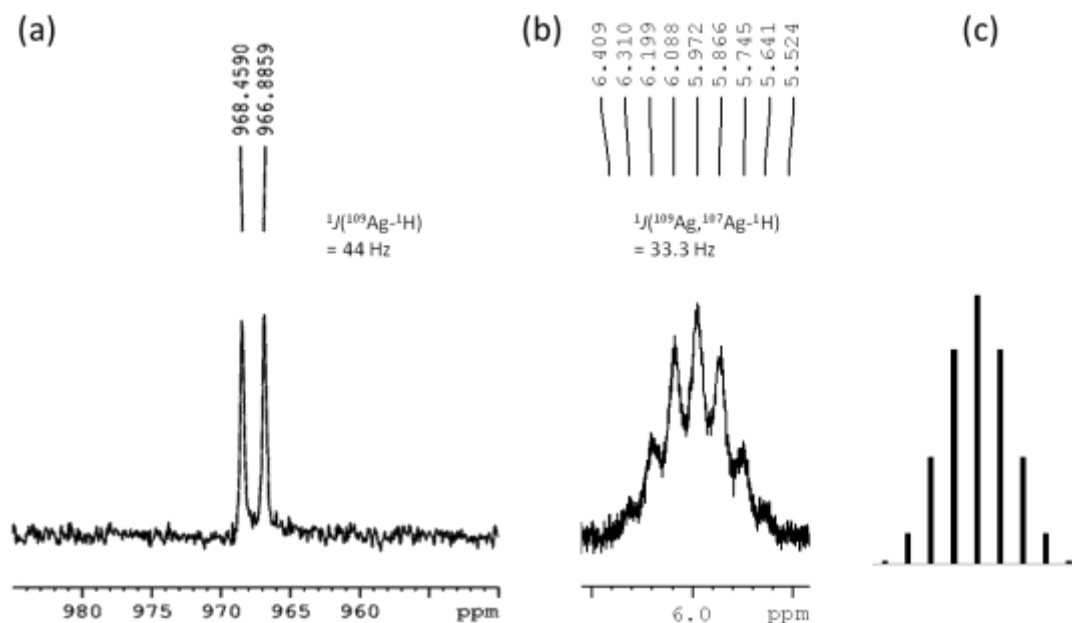

**Figure S13** The splitting patterns of compound **5** that consisting one doublet in (a)  $^{109}\text{Ag}$  NMR and one nonet in (b)  $^1\text{H}$  NMR spectra. (c) Simulated Intensity ratio for a nonet resonance.

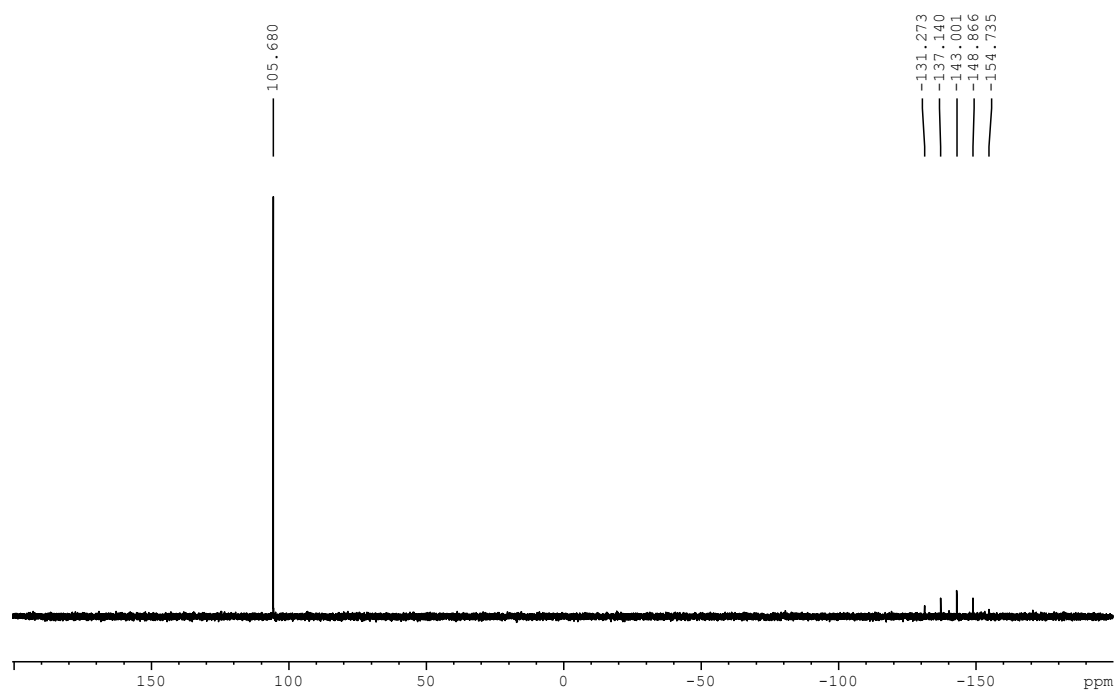

**Figure S14**  $^{31}\text{P}\{^1\text{H}\}$  NMR spectrum of  $[\text{Ag}_8(\text{D})\{\text{S}_2\text{P}(\text{O}^i\text{Pr})_2\}_6](\text{PF}_6)$ , **5'**.

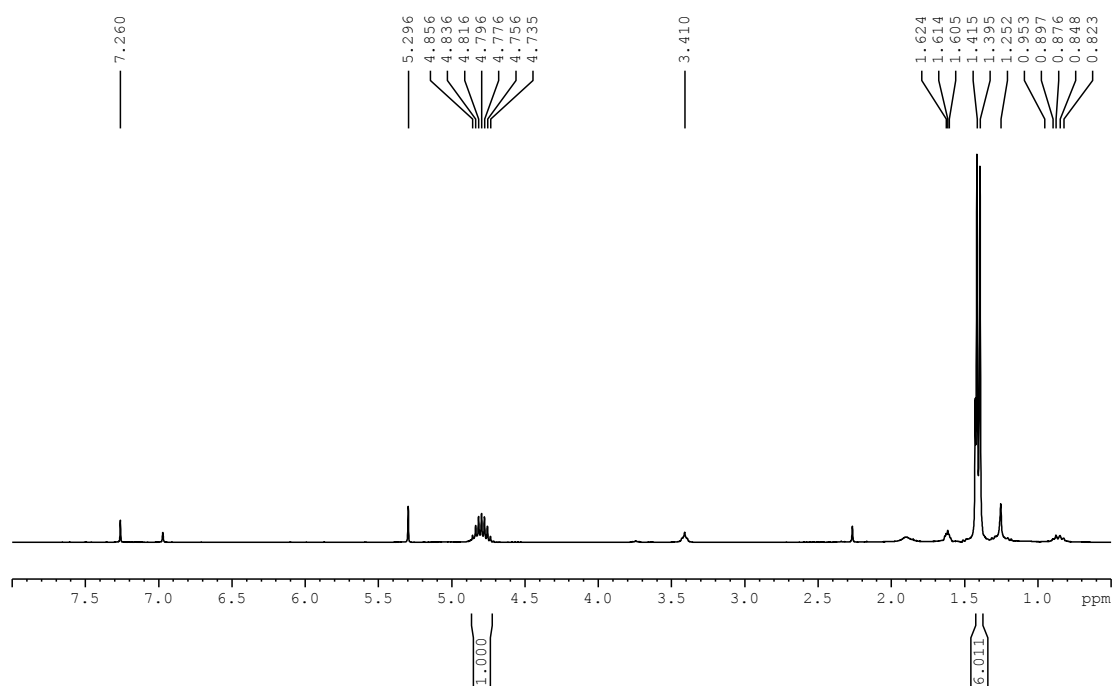

**Figure S15**  $^1\text{H}$  NMR spectrum of  $[\text{Ag}_8(\text{D})\{\text{S}_2\text{P}(\text{O}^i\text{Pr})_2\}_6](\text{PF}_6)$ , **5'**.



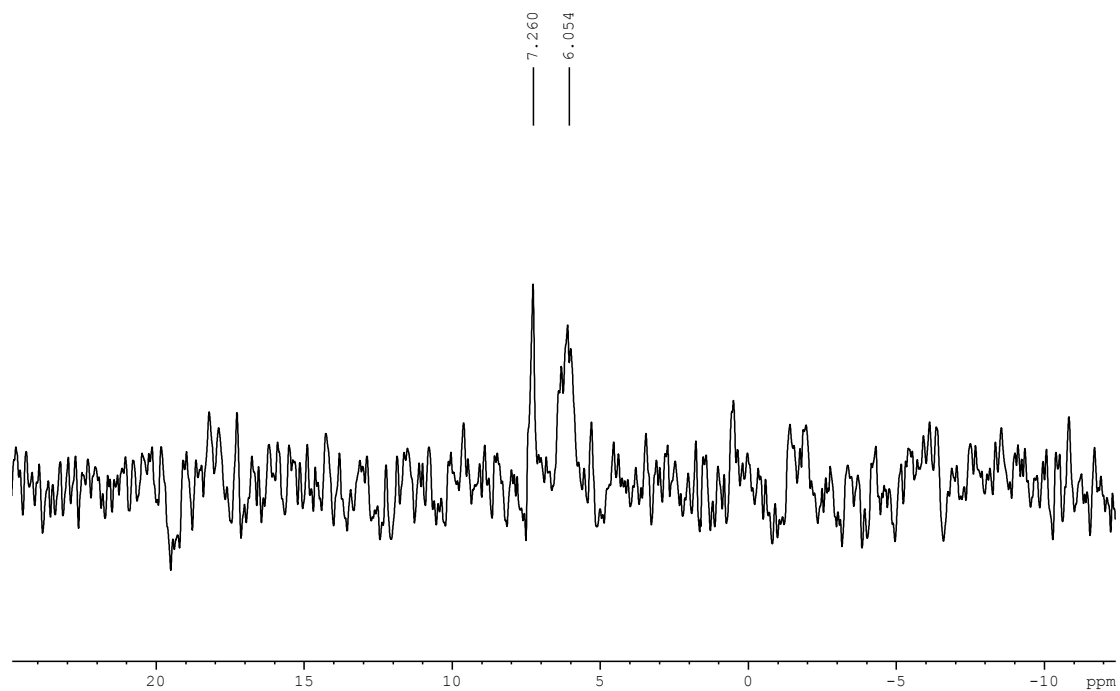

**Figure S16**  $^2\text{H}$  NMR spectrum of  $[\text{Ag}_8(\text{D})\{\text{S}_2\text{P}(\text{O}^i\text{Pr})_2\}_6](\text{PF}_6)$ , **5'**.

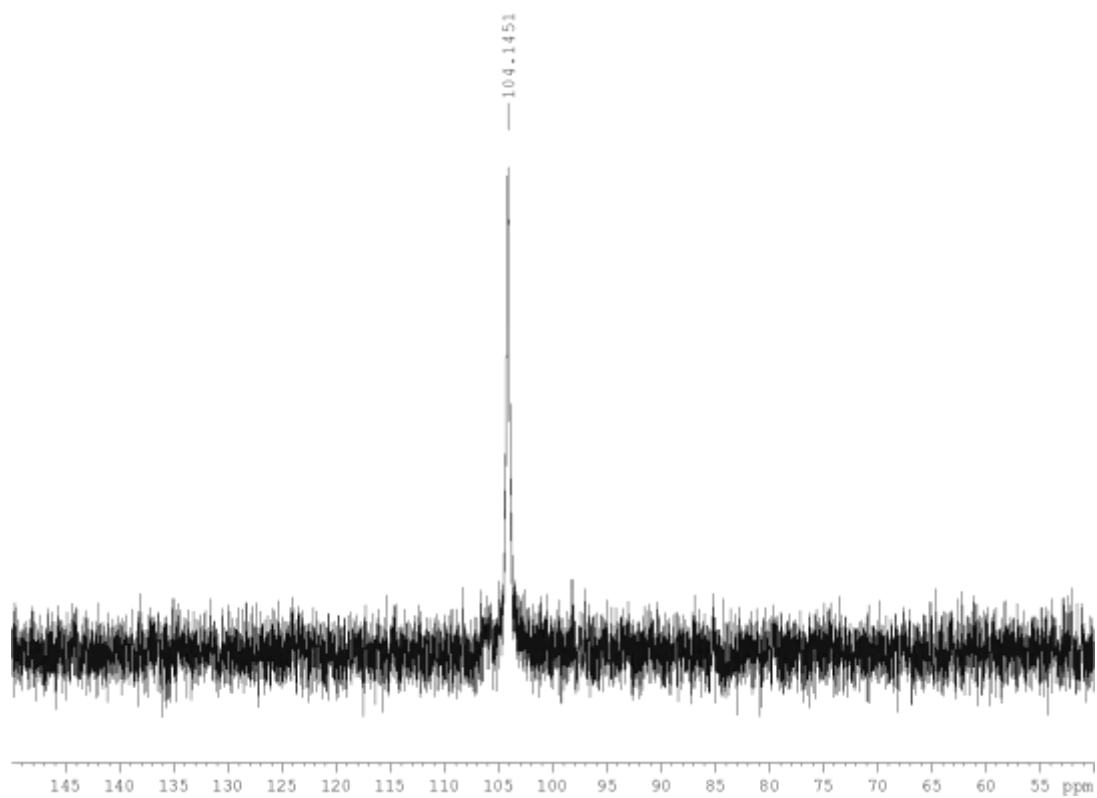

**Figure S17**  $^{31}\text{P}\{^1\text{H}\}$  NMR spectrum of  $[\text{Ag}_8(\mu_8\text{-S})\{\text{S}_2\text{P}(\text{O}^i\text{Pr})_2\}_6]$ , **6**.

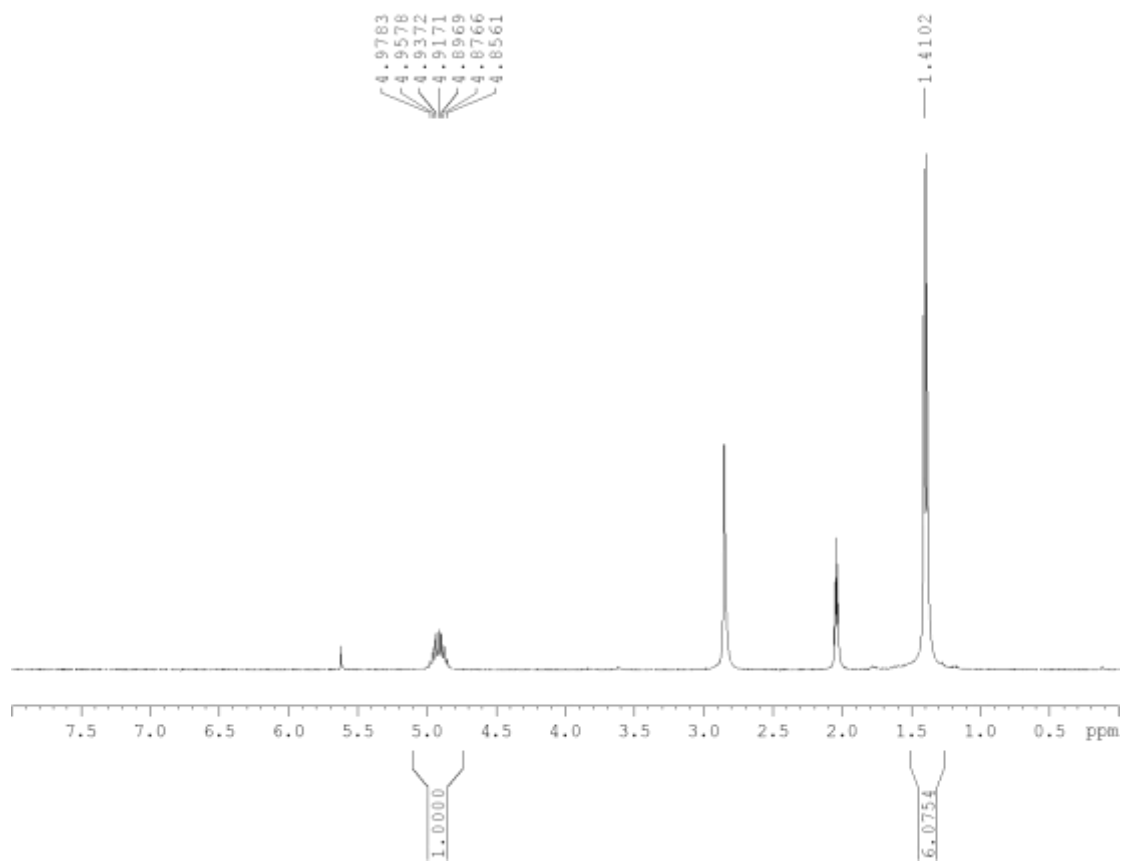

**Figure S18**  $^1\text{H}$  NMR spectrum of  $[\text{Ag}_8(\mu_8\text{-S})\{\text{S}_2\text{P}(\text{O}^i\text{Pr})_2\}_6]$ , **6**.

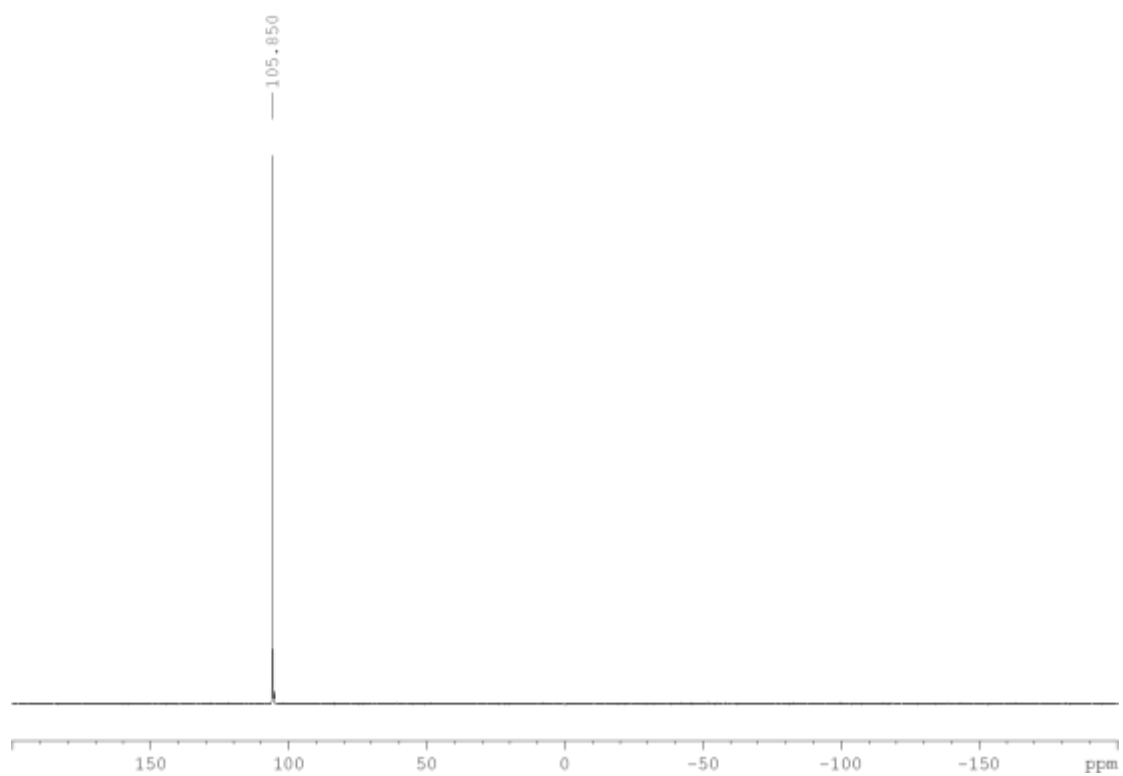

**Figure S19**  $^{31}\text{P}\{^1\text{H}\}$  NMR spectrum of  $[\text{Ag}_{10}(\mu_9\text{-I})(\mu_3\text{-I})_3\{\text{S}_2\text{P}(\text{O}^i\text{Pr})_2\}_6]$ , **7**.

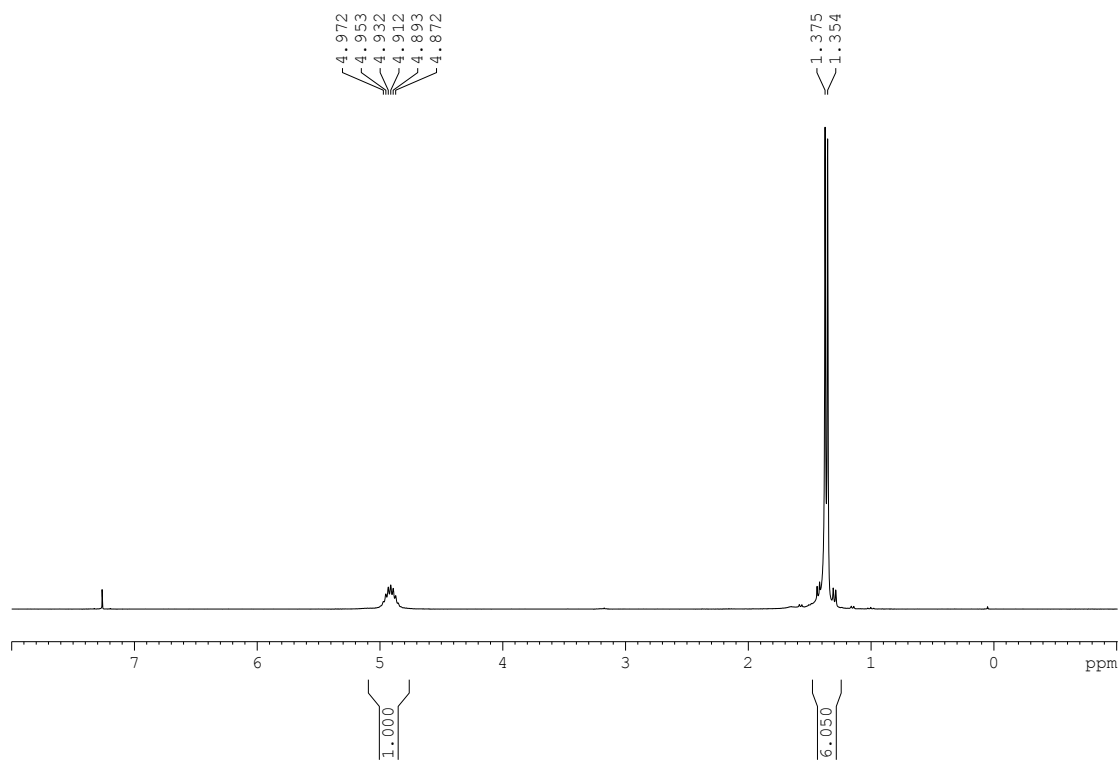

**Figure S20**  $^1\text{H}$  NMR spectrum of  $[\text{Ag}_{10}(\mu_9\text{-I})(\mu_3\text{-I})_3\{\text{S}_2\text{P}(\text{O}^i\text{Pr})_2\}_6]$ , **7**.

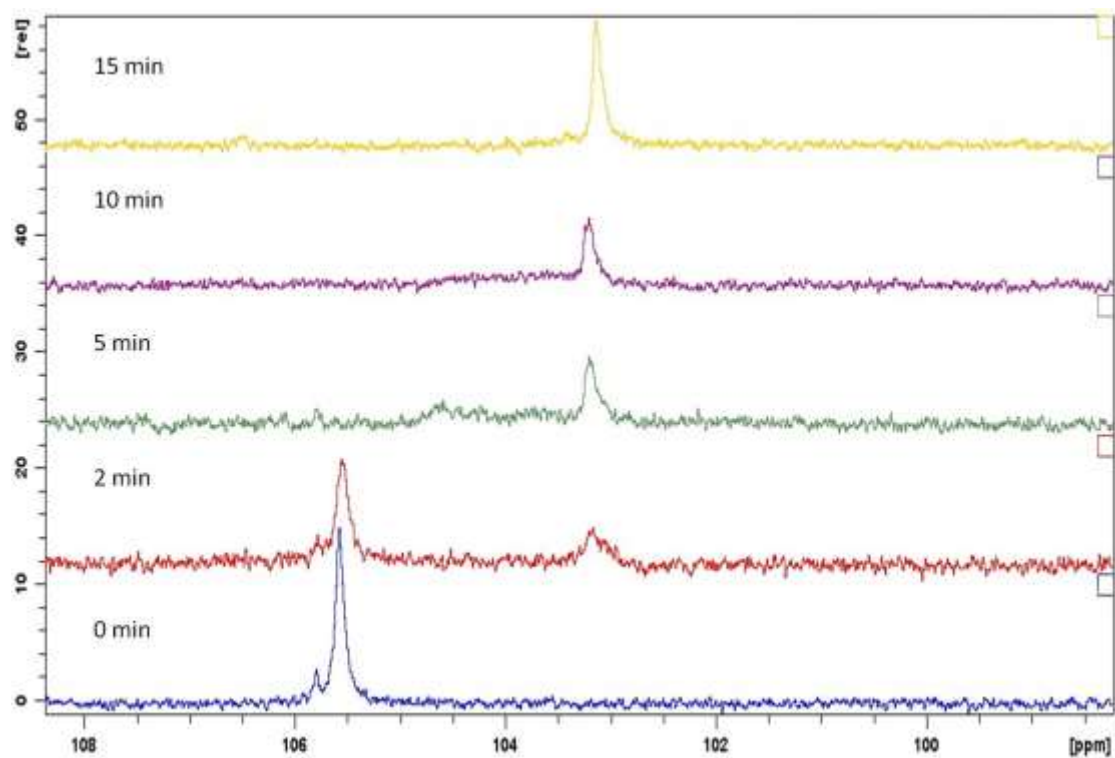

**Figure S21**  $^{31}\text{P}\{^1\text{H}\}$  NMR spectra of monitoring the conversion within 15 minutes from  $[\text{Ag}_{10}(\mu_9\text{-I})(\mu_3\text{-I})_3\{\text{S}_2\text{P}(\text{O}^i\text{Pr})_2\}_6]$  to  $[\text{Ag}_{11}(\mu_9\text{-I})(\mu_3\text{-I})_3\{\text{S}_2\text{P}(\text{O}^i\text{Pr})_2\}_6]\text{PF}_6$  by adding one equivalent (relative to  $[\text{Ag}_{10}(\mu_9\text{-I})(\mu_3\text{-I})_3\{\text{S}_2\text{P}(\text{O}^i\text{Pr})_2\}_6]$ ) of  $[\text{Ag}(\text{CH}_3\text{CN})_4]\text{PF}_6$ .
